# Supplementary material
Source: PubMed Central journal article supplement (PMC4919586)
Supplement: mmc1.pdf [file mmc1.pdf]

**Biophysical Journal, Volume 110**

**Supplemental Information**

**Deoxygenation Reduces Sickle Cell Blood Flow at Arterial Oxygen  
Tension**

**Xinran Lu, David K. Wood, and John M. Higgins**

## Supplementary Information for

### Deoxygenation Reduces Sickle Cell Blood Flow at Arterial Oxygen Tension

#### Qualitative Assessment of Hemoglobin Oxygen Saturation and Desaturation

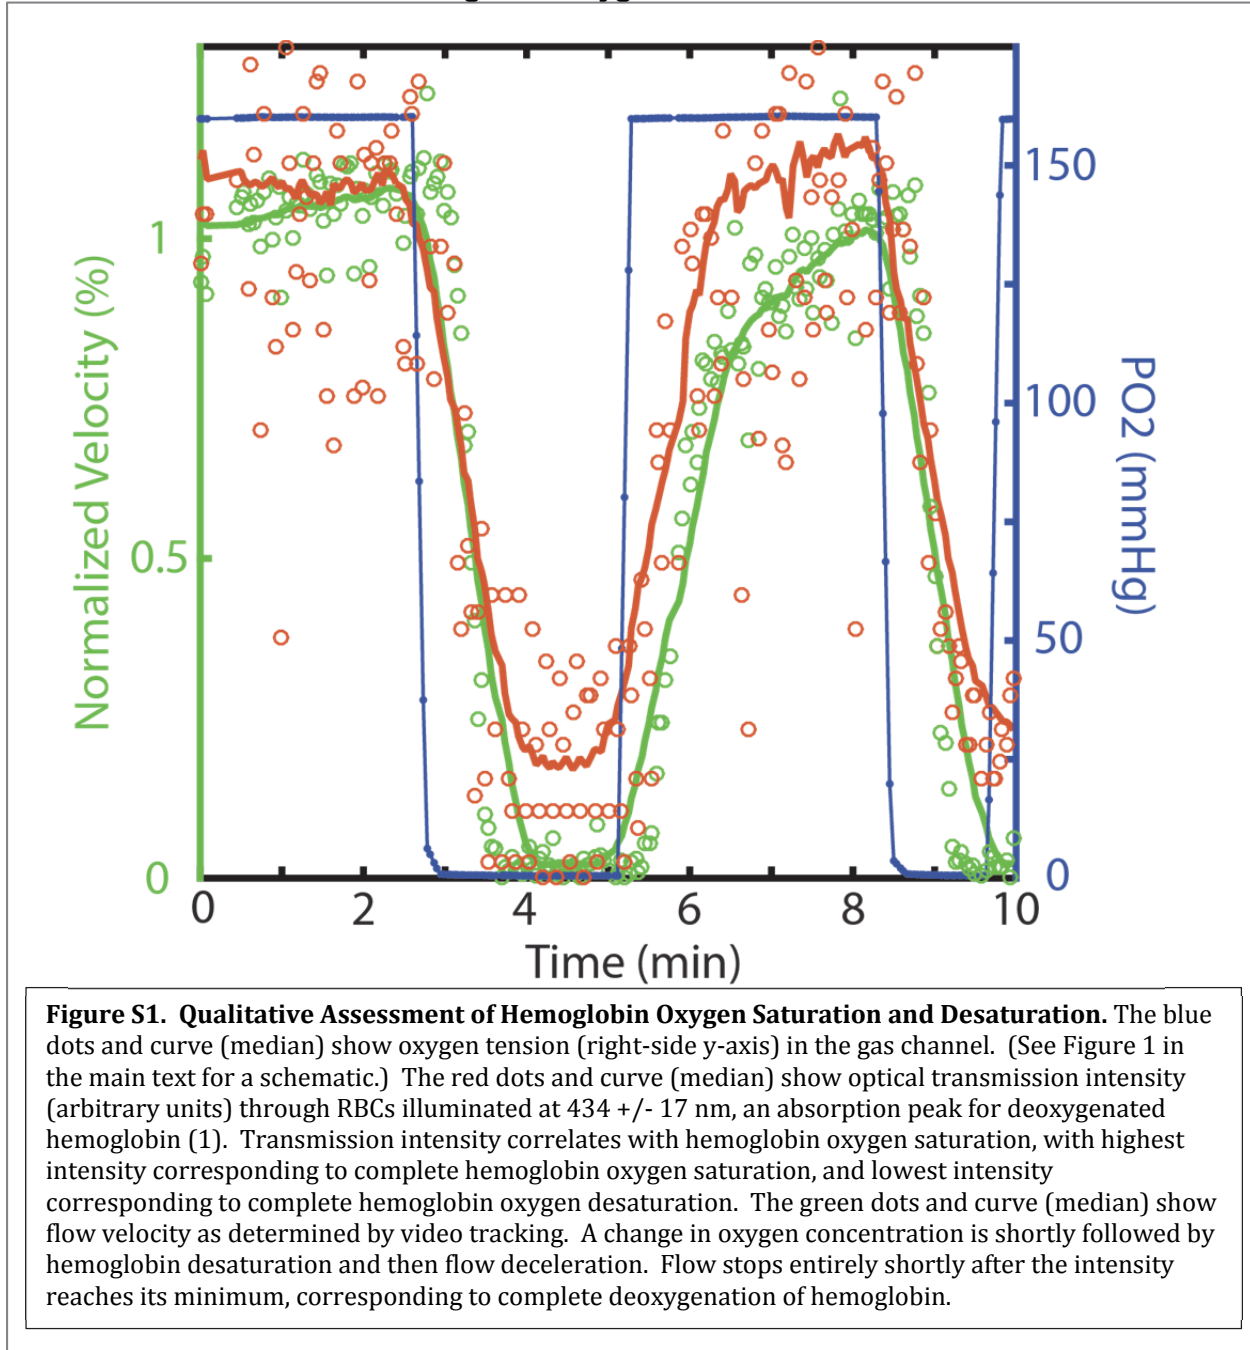

## Calibration and Simulation of Oxygen Diffusion Times

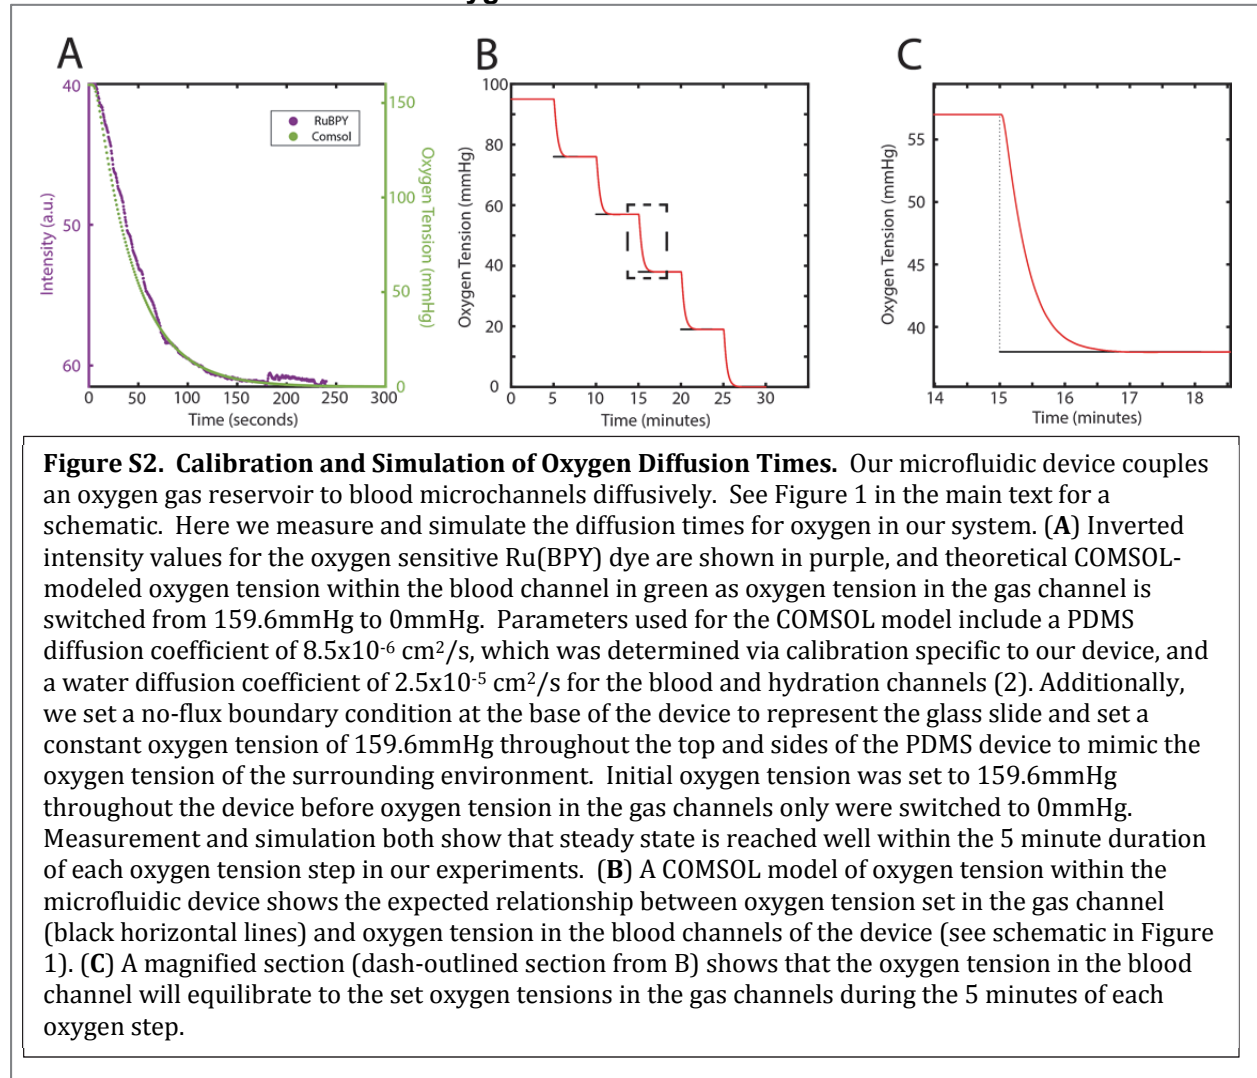

### Transient Deoxygenation Overshoots Do Not Alter Apparent Viscosity

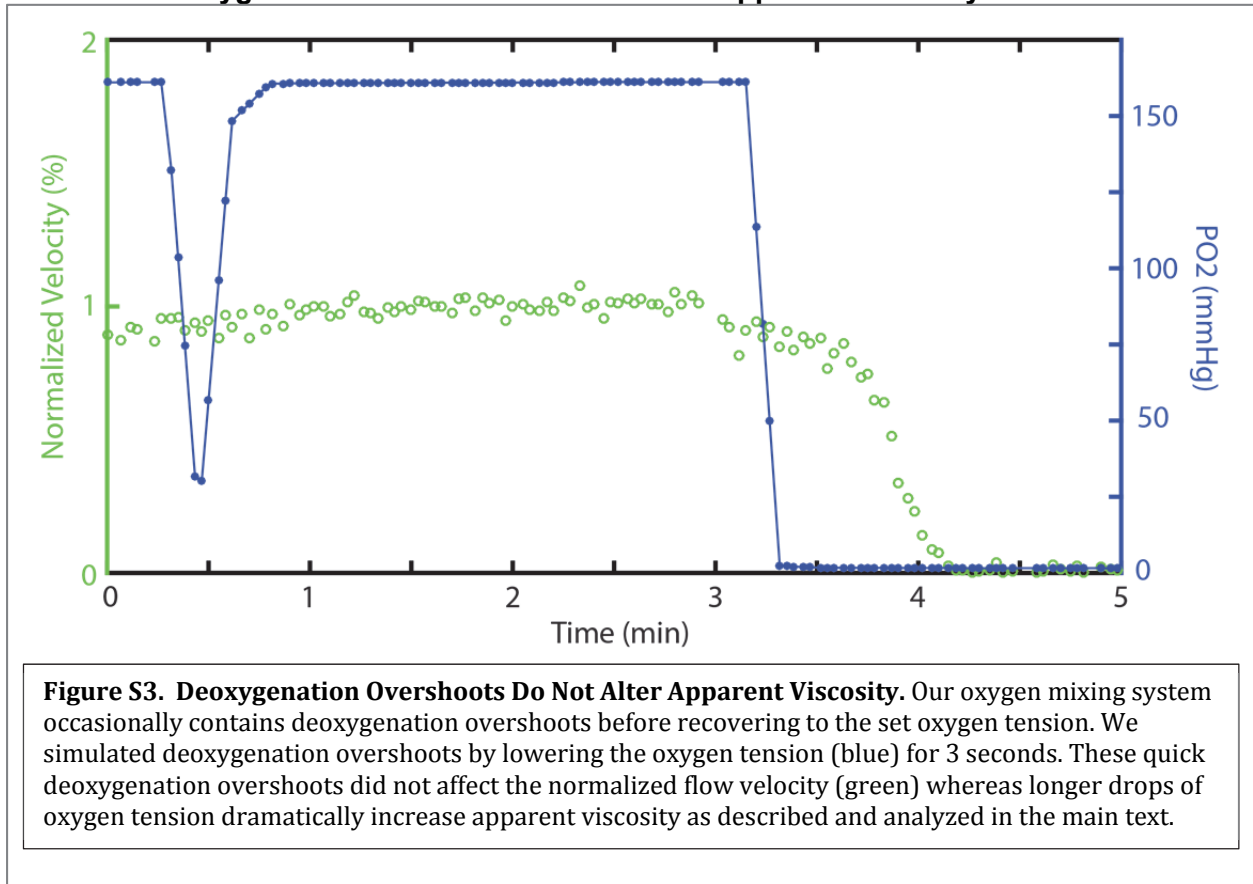

## Apparent Viscosity is Oxygen-Dependent even at Very Low HbS%

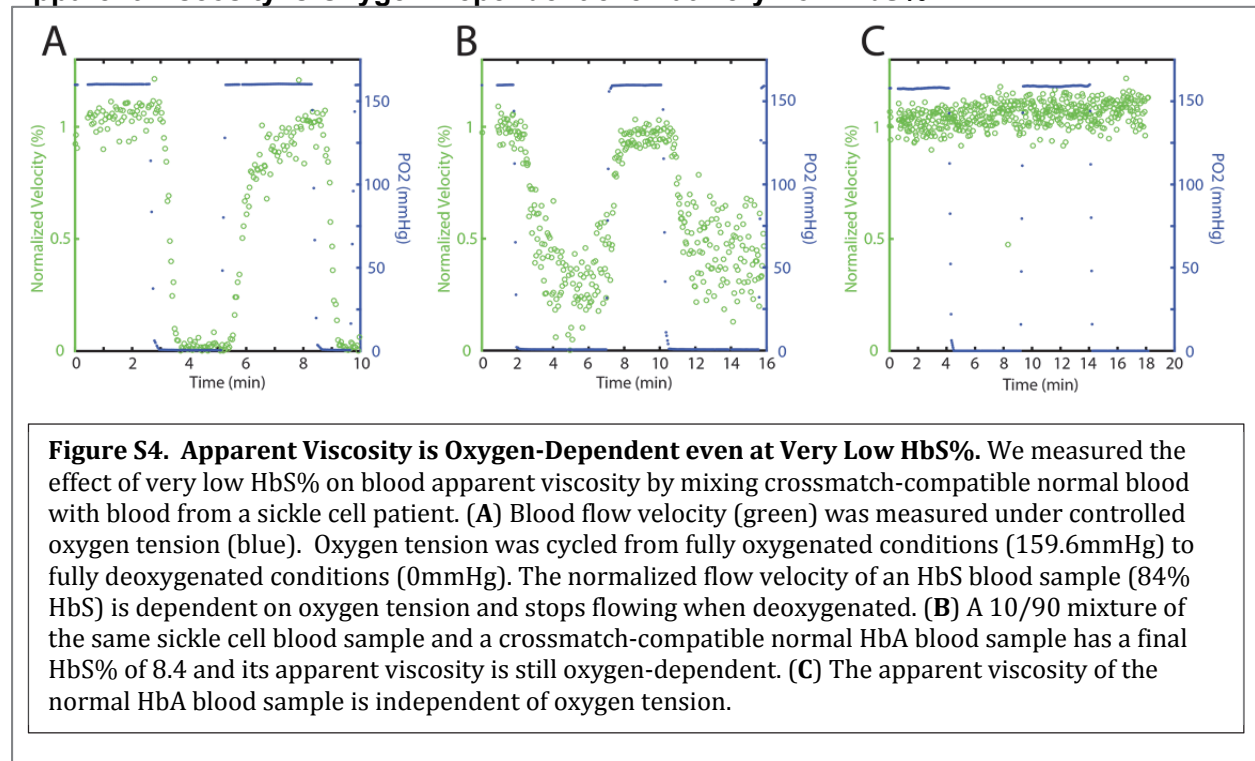

## References

1. Zhujun, Z., and W. R. Seitz. 1986. Optical sensor for oxygen based on immobilized hemoglobin. *Anal. Chem.* 58:220-222.
2. Han, P., and D. M. Bartels. 1996. Temperature dependence of oxygen diffusion in H<sub>2</sub>O and D<sub>2</sub>O. *J. Phys. Chem.* 100:5597-5602.
